# Supplementary material
Source: PubMed Central journal article supplement (PMC5480807)
Supplement: DS_10.1177_0022034517698096.pdf [file DS_10.1177_0022034517698096.pdf]

## Targeting of *Streptococcus mutans* Biofilms by a Novel Small Molecule Prevents Dental Caries and Preserves the Oral Microbiome

S.S. Garcia, M.S. Blackledge, S. Michalek, L. Su, T. Ptacek, P. Eipers, C. Morrow, E.J. Lefkowitz, C. Melander, and H. Wu

### APPENDIX

**Appendix Table 1. Summary of results from a rat caries study after 4 weeks of either repeated topical application or no treatment.**

|                                                              | Topical Application of Vehicle Control                    | No Treatment                                                                                        |
|--------------------------------------------------------------|-----------------------------------------------------------|-----------------------------------------------------------------------------------------------------|
| Mean enamel caries score                                     | Buccal: 13.4±0.6<br>Sulcal: 19.6±0.5<br>Proximal: 6.8±0.5 | Buccal: 14.8±0.3 <sup>ns</sup><br>Sulcal: 21.2±0.4 <sup>ns</sup><br>Proximal: 7.7±0.3 <sup>ns</sup> |
| Weight (g)                                                   | 160±14                                                    | 149±10 <sup>ns</sup>                                                                                |
| CFUs recovered<br><i>S. mutans</i> UA159 (x10 <sup>6</sup> ) | 4.7±1.1                                                   | 4.8±0.8 <sup>ns</sup>                                                                               |

Samples were collected at the end of the study. n=6 per group. Groups were compared by

ANOVA. ns = not significant.

**Appendix Table 2. Mean relative abundance of phylum in Sm+CPD and End samples in different rat groups.**

| <b>Treatment</b>    |                        |                    |                    |
|---------------------|------------------------|--------------------|--------------------|
| <b>3F1</b>          | <b>Taxonomy-Phylum</b> | <b>Mean-Sm+CPD</b> | <b>Mean-End</b>    |
|                     | TM7                    | 0                  | 0.27*              |
|                     | Gemmatimonadetes       | 0.00105            | 0.06*              |
|                     | Firmicutes             | 59.61              | 51.59              |
|                     | Proteobacteria         | 24.15              | 28.17              |
|                     | Bacteroidetes          | 9.08               | 15.77              |
|                     | Actinobacteria         | 2.58               | 1.96               |
|                     | Verrucomicrobia        | 2.78               | 0.87               |
|                     | Cyanobacteria          | 0.11               | 0.16               |
|                     | [Thermi]               | 0.5                | 0.36               |
|                     | Fusobacteria           | 0.09               | 0.47               |
|                     | Spirochaetes           | 0.52               | 0.13               |
|                     | Deferribacteres        | 0.31               | 0.01               |
|                     | Tenericutes            | 0.09               | 0.04               |
| <b>No Treatment</b> | TM7                    | 0                  | 0.15*              |
|                     | Gemmatimonadetes       | 0.00109            | 0.06*              |
|                     | Firmicutes             | 72.23              | 56                 |
|                     | Proteobacteria         | 17.07              | 23.11              |
|                     | Bacteroidetes          | 3.9                | 15.2               |
|                     | Actinobacteria         | 1.9                | 3.24               |
|                     | Verrucomicrobia        | 3.38               | 1.08               |
|                     | Cyanobacteria          | 0.21               | 0.27               |
|                     | [Thermi]               | 0.33               | 0.3                |
|                     | Fusobacteria           | 0.22               | 0.32               |
|                     | Spirochaetes           | 0.64               | 0.07               |
|                     | Deferribacteres        | 0.04               | 0.03               |
|                     | Tenericutes            | 0.04               | 0.08               |
| <b>Fluoride</b>     | TM7                    | 0.05               | 0.24 <sup>ns</sup> |
|                     | Gemmatimonadetes       | 0.06               | 0.03 <sup>ns</sup> |
|                     | Firmicutes             | 55.57              | 56.91              |
|                     | Proteobacteria         | 30.04              | 24.81              |
|                     | Bacteroidetes          | 6.08               | 14.04              |
|                     | Actinobacteria         | 2.18               | 2.01               |
|                     | Verrucomicrobia        | 0.5                | 0.75               |
|                     | Cyanobacteria          | 4.62               | 0.2                |
|                     | [Thermi]               | 0.26               | 0.28               |
|                     | Fusobacteria           | 0.27               | 0.48               |
|                     | Spirochaetes           | 0.03               | 0.03               |
|                     | Deferribacteres        | 0.08               | 0.01               |
|                     | Tenericutes            | 0.18               | 0.07               |

\*p < 0.05 after FDR correction, ns = not significant

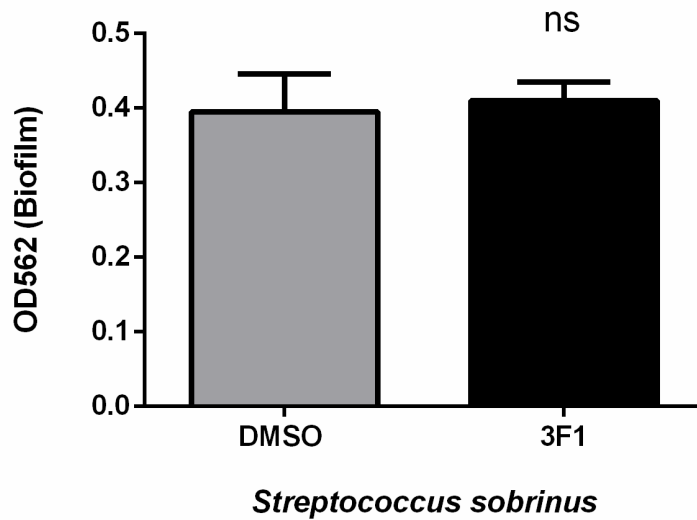

**Appendix Figure 1.** Small molecule 3F1 does not disperse *Streptococcus sobrinus* biofilms *in vitro*.

*S. sobrinus* biofilms were formed for 6 h. Biofilms were then washed and treated with DMSO, 5 $\mu$ M 3F1, or 5 $\mu$ M 3F2 for 14 h. After 14 h, cells released into the media were measured at OD<sub>470</sub>. Loosely adhered cells were then washed off and remaining biomass quantitated by crystal violet staining at OD<sub>562</sub>. Bars represent the mean of 3 independent experiments. Differences were statistically compared by ANOVA. Error bars represent standard error. ns = not significant.

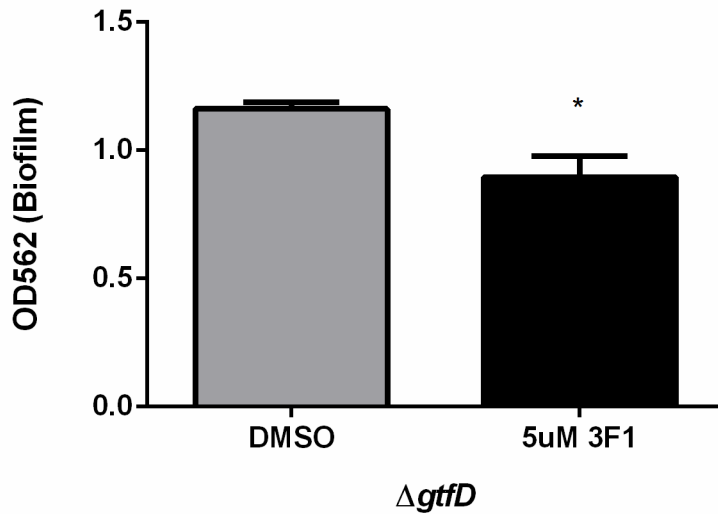

**Appendix Figure 2. Small molecule 3F1 disperses *S. mutans* biofilm independent of GtfD.**

*S. mutans* single-gene knock-out mutant lacking GtfD ( $\Delta gtfD$ ) was allowed to form biofilms for 6 h. Biofilms were then washed and treated with DMSO or 5μM 3F1 for 14 h. Loosely adhered cells were then washed off and remaining biomass quantitated by crystal violet staining at OD<sub>562</sub>. Bars represent the mean of 3 independent experiments. Differences were statistically compared by ANOVA. Error bars represent standard error. \*p < 0.05.
